# Supplementary material for: The Expression of miRNAs Involved in Long-Term Memory Formation in the CNS of the Mollusk Helix lucorum
Source: MDPI journal article supplement (doi:10.3390/ijms24010301), 2022-12-24
Supplement: s1 [file s1]

Alignments of human and mollusks mature microRNAs belonging to the families MIR-10, -33, -76, -92, -133, -137, -193, -277, -1985.

Species designations: Hlu – *Helix lucorum*, Hsa – *Homo sapiens*, Lgi – *Lottia gigantea*, Cgi – *Crassostrea gigas*, Aca – *Aplysia californica*.

|                   |                        |
|-------------------|------------------------|
| Hlu-Mir-10-S5_5p  | AACCCGUAGAACCGAACUUGU— |
| Hlu-Mir-10-S6_5p  | AACCCGUAGA—CCGAACUUGU— |
| Hsa-miR-10-P2d-5p | AACCCGUAGAUCCGAACUUGUG |
| Lgi-Mir-10-P2_5p  | AACCCGUAGAUCCGAACUUGUG |
| Cgi-Mir-10-P2_5p  | AACCCGUAGAUCCGAACUUGUG |
| Aca-Mir-10-P2d_5p | AACCCGUAGAUCCGAACUUGUG |
|                   | *****                  |

|                   |                        |
|-------------------|------------------------|
| Hlu-Mir-10-S9_5p  | UCCCUGAGACCAUAAUUUGAGC |
| Hlu-Mir-10-S10_5p | ACCCUGAGACCAUAAUUUGAUC |
| Hlu-Mir-10-S12_5p | UCCCUGAGACCAUAAUU—GAGC |
| Hlu-Mir-10-S18_5p | UCCCUGAGACCAAAAUUUGUGC |
| Hlu-Mir-10-S19_5p | UCCCUGAGACUAAAUUUGUGC  |
| Hsa-Mir-10-P3d_5p | UCCCUGAGACCCUAACUUGUGA |
| Lgi-Mir-10-P3_5p  | UCCCUGAGACCAUAAUUUUGAU |
| Cgi-Mir-10-P3_5p  | UCCCUGAGACCAUAACUUGUGA |
| Aca-Mir-10-P3d_5p | UCCCUGAGACCCUAACUUGUGA |
|                   | ***** ** *             |

|                  |                       |
|------------------|-----------------------|
| Hlu-Mir-33_5p    | GUGCAUUGUAGUUGCAUUGCC |
| Hsa-Mir-33-P3_5p | GUGCAUUGUAGUUGCAUUGCA |
| Lgi-Mir-33_5p    | GUGCAUUGUAGUUGCAUUGCA |
| Cgi-Mir-33_5p    | GUGCAUUGUAGUUGCAUUGCA |
| Aca-Mir-33-P3_5p | GUGCAUUGUAGUUGCAUUGCA |
|                  | *****                 |

|                  |                         |
|------------------|-------------------------|
| Hlu-Mir-76-S2_3p | UUCGUUGUCGUCGAAACAUGACU |
| Hlu-Mir-76-S3_3p | UUCGUUGUAUUCGAAACCUGCCU |
| Lgi-Mir-76_3p    | UUCGUUGUCGACGAAACCUGCCU |
| Cgi-Mir-76_3p    | UUCGUUGUCGUCGAAACCUGCCU |
|                  | ***** ***** ** **       |

|                   |                         |
|-------------------|-------------------------|
| Hlu-Mir-92-S1_3p  | AAUUGCACUCGUCCCGGCCUGC  |
| Hlu-Mir-92-S2_3p  | CAUUGCACUUAUCCCGGCCUCA  |
| Hlu-Mir-92-S3_3p  | UAUUGCACUCGUCCCGGCCUUC  |
| Hlu-Mir-92-S4_3p  | CAUUGCACUUAUCCCGGCCUUGA |
| Hsa-Mir-92-P1d_3p | UAUUGCACUCGUCCCGGCCUCC  |
| Lgi-Mir-92-o30_3p | AAUUGCACUUGUCCCGGCCUGC  |
| Cgi-Mir-92-o33_3p | UAUUGCACUCGUCCCGGCCGAU  |
| Aca-Mir-92-P1c_3p | UAUUGCACUUGUCCCGGCCUGU  |
|                   | *****                   |

|                      |                        |
|----------------------|------------------------|
| Hlu-Mir-133_3p       | UUGGUCCCCUUCAUCAGUUGU  |
| Hsa-Mir-133-P1-v2_3p | UUGGUCCCCUUCAACCAGCUGU |
| Lgi-Mir-133_3p       | UUGGUCCCCUUCAACCAGCUGU |
| Cgi-Mir-133_3p       | UUGGUCCCCUUCAACCAGCUGU |
| Aca-Mir-133-P1-v2_3p | UUGGUCCCCUUCAACCAGCUGU |
|                      | ***** ** *             |

|                      |                         |
|----------------------|-------------------------|
| Hlu-Mir-137_3p       | UAUUGCUUGAGAAUACACGUAA— |
| Hsa-Mir-137-P1-v2_3p | UAUUGCUUAAGAAUACGCGUAGU |
| Lgi-Mir-137_3p       | UAUUGCUUGAGAAUACACGUAA— |
| Cgi-Mir-137_3p       | UUAUUGCUUGAGAAUACACGU   |
| Aca-Mir-137-P3-v2_3p | UAUUGCUUGAGAAUACGCGUAGU |
|                      | ***** ** *              |

|                     |                         |
|---------------------|-------------------------|
| Hlu-Mir-193_3p      | UACUGGCCUUCAAAUCCCAA    |
| Hsa-Mir-193-P1a_3p  | AACUGGCCCUCAAAGUCCCGCU  |
| Lgi-Mir-193-P1_3p   | UACUGGCCUGCAAAAUCCCAACU |
| Cgi-Mir-193-P1_3p   | UACUGGCCUGCAAAAUCCCAA   |
| Aca-Mir-193-P1b_3p* | AACUGGCCUACAAAGUCCAGU   |
|                     | ***** ** *              |

|                |                         |
|----------------|-------------------------|
| Hlu-Mir-277_3p | UAAAUGCAUUAUCUGGUAUCUG  |
| Lgi-Mir-277_3p | UAAAUGCAUUUUCUGGUAUCUGA |
| Cgi-Mir-277_3p | UAAAUGCAUAAUCUGGUAUGUGA |
|                | ***** ** *              |

|                    |                         |
|--------------------|-------------------------|
| Hlu-Mir-1985-S1_5p | UGCCAUUUUUAUCAGUCACUGU  |
| Lgi-Mir-1985_5p    | UGCCAUUUUUAUCAGUCACUGUG |
| Cgi-Mir-1985_5p    | UGCCAUUUUUAUCAGUCACUGUG |
|                    | *****                   |
